1 **Transcriptional landscape of human microglia**  
2 **reveals robust gene expression signatures that**  
3 **implicates age, sex and *APOE*-related**  
4 **immunometabolic pathway perturbations**

5  
6 Tulsi Patel Ph.D<sup>1</sup>, Troy P. Carnwath<sup>1</sup>, Xue Wang Ph.D<sup>2</sup>, Mariet  
7 Allen Ph.D<sup>1</sup>, Sarah J. Lincoln<sup>1</sup>, Laura J. Lewis-Tuffin Ph.D<sup>3</sup>,  
8 Zachary S. Quicksall<sup>2</sup>, Shu Lin<sup>1</sup>, Frederick Q. Tutor-New<sup>1</sup>,  
9 Charlotte C.G. Ho<sup>1</sup>, Yuhao Min<sup>1</sup>, Kimberly G. Malphrus<sup>1</sup>, Thuy  
10 T. Nguyen<sup>1</sup>, Elizabeth Martin<sup>5</sup>, Cesar A. Garcia<sup>5</sup>, Rawan M.  
11 Alkharboosh<sup>5,6,7</sup>, Sanjeet Grewal M.D<sup>5</sup>, Kaisorn Chaichana  
12 M.D<sup>5</sup>, Robert Wharen M.D<sup>5</sup>, Hugo Guerrero-Cazares M.D  
13 Ph.D<sup>5</sup>, Alfredo Quinones-Hinojosa M.D<sup>5</sup>, Nilüfer Ertekin-Taner  
14 M.D Ph.D<sup>1,4,#</sup>

15  
16 **Author Affiliations:**

- 17 1) Department of Neuroscience, Mayo Clinic, Jacksonville, FL 32224 USA  
18 2) Department of Quantitative Health Sciences, Mayo Clinic, Jacksonville, FL 32224 USA  
19 3) Department of Cancer, Mayo Clinic, Jacksonville, FL 32224 USA

20 4) Department of Neurology, Mayo Clinic, Jacksonville, FL 32224 USA

21 5) Department of Neurosurgery, Mayo Clinic, Jacksonville, FL 32224 USA

22 6) Neuroscience Graduate Program, Mayo Clinic Graduate School of Biomedical Sciences,  
23 Mayo Clinic, Rochester, MN 55905, USA.

24 7) Regenerative Sciences Training Program, Center for Regenerative Medicine, Mayo  
25 Clinic, Rochester, MN 55905, USA

26 # Corresponding Author

27 **Corresponding Author Contact Information:**

28 Departments of Neurology and Neuroscience, Mayo Clinic, 4500 San Pablo Road, Birdsall  
29 3, Jacksonville, FL 32224. Email: [taner.nilufer@mayo.edu](mailto:taner.nilufer@mayo.edu), Phone: 904-953-7103, Fax: 904-  
30 953-7353.

31 **Number of Figures: 3**

32 **Number of Supplementary Tables: 9**

33 **Number of Supplementary Figures: 7**

34 **Word Count:** 5,975 (includes Methods word count of 1,810)

35 **References:** 84

36

37 **Abbreviations:**

38 AD: Alzheimer's disease

39 APOE: Apolipoprotein E

40 BM: Brodmann's area

41 BSA: Bovine serum albumin

42 CERAD: Consortium to Establish a Registry for Alzheimer's Disease

- 43 CNS: Central nervous system
- 44 CQN: Conditional quantile normalization
- 45 DAM: Disease-associated microglia
- 46 DPBS: Dulbecco's phosphate buffered saline
- 47 FACS: Fluorescence-activated cell sorting
- 48 FPKM: Fragments per kilobase of transcript per million mapped reads
- 49 GEM: Gel bead-in emulsion
- 50 GO: Gene ontology
- 51 MACS: Magnetic-activated cell sorting
- 52 ME: Module eigengenes
- 53 MM: Module membership
- 54 PBS: Phosphate buffered saline
- 55 PC: Principal component
- 56 PCA: Principle component analysis
- 57 PFA: Paraformaldehyde
- 58 QC: Quality control
- 59 RNAseq: RNA sequencing
- 60 ROSMAP: Rush University Religious Order Study-Memory and Aging Project
- 61 scRNAseq: Single cell RNA sequencing
- 62 snRNAseq: Single nuclei RNA sequencing
- 63 UMI: Unique molecular identifier
- 64 WGCNA: Weighted gene co-expression network analysis

65 **Abstract:**

66 Microglia have fundamental roles in health and disease, however effects of age, sex and  
67 genetic factors on human microglia have not been fully explored. We applied bulk and single  
68 cell approaches to comprehensively characterize human microglia transcriptomes and their  
69 associations with age, sex and *APOE*. We identified a novel microglial signature,  
70 characterized its expression in bulk data from 1,306 brain samples across 6 regions and in  
71 single cell microglia transcriptome. We discovered microglial co-expression network  
72 modules associated with age, sex and *APOE-ε4* that are enriched for lipid and carbohydrate  
73 metabolism genes. Integrated analyses of modules with single cell transcriptomes revealed  
74 significant overlap between age-associated module genes and both pro-inflammatory and  
75 disease-associated microglial clusters. These modules and clusters harbor known  
76 neurodegenerative disease genes including *APOE*, *PLCG2* and *BIN1*. These data represent  
77 a well-characterized human microglial transcriptome resource; and highlight age, sex and  
78 *APOE*-related microglial immunometabolism perturbations with potential relevance in  
79 neurodegeneration.

80

## 81 **Introduction**

82 Microglia are the resident macrophages of the central nervous system (CNS), responsible  
83 for clearance of cellular debris and pathological protein aggregates. In the healthy brain they  
84 exist in a resting state and can be induced to a reactive state in response to changes in the  
85 CNS microenvironment, such as inflammation and neuronal damage<sup>1</sup>. They are fundamental  
86 to maintaining brain homeostasis during development, aging and disease, therefore  
87 microglial dysfunction could ultimately lead to neurodegeneration<sup>2</sup>. Microglia are integral to  
88 the pathophysiology of neurodegenerative diseases, including Alzheimer's disease (AD) and  
89 multiple sclerosis, with chronic inflammation implicated as a contributing factor<sup>3-5</sup>.

90 Fresh human brain tissue studies are imperative to the characterization of the microglial  
91 transcriptome in health and disease; however, accessibility is limited. Although single nuclei  
92 studies using frozen tissue provide an easier alternative, recent studies have demonstrated  
93 limitations in detecting substantial populations of less abundant cell types<sup>6,7</sup>. Additionally, it  
94 was recently reported that many microglial activation genes are expressed in the cytosol and  
95 therefore are likely to be missed by single nuclei RNA sequencing (snRNAseq)<sup>8</sup>. Recent  
96 single cell studies aiming to characterize microglial gene expression using fresh tissue have  
97 highlighted the heterogeneity in microglial phenotypes<sup>9-11</sup>. This has revealed that phenotypic  
98 changes are not binary but rather a spectrum of states in which microglia can simultaneously  
99 co-exist during transition from resting to more reactive states. Additionally, these different  
100 subsets could have specialized functions in brain homeostasis and dysfunction. Thus, it is  
101 increasingly important to characterize these heterogeneous subpopulations to understand  
102 their roles in health and disease. This could also help facilitate the design of novel  
103 therapeutic approaches to target specific subpopulations of cells and modulate their activity<sup>2</sup>.

104 Microglial expression has been shown to be affected by aging<sup>12,13</sup>, however few studies have  
105 investigated the effects of sex and genetic factors on human microglia. Sex differences in  
106 microglia have been previously reported in mice, with females being predisposed to  
107 harboring more activated microglia than males<sup>14-16</sup>. *APOE*, a lipoprotein of which the  $\epsilon 4$  allele

108 (*APOE*- $\epsilon$ 4) is a major risk factor for AD and also implicated in other neurodegenerative  
109 diseases<sup>17</sup>, is upregulated in disease-associated microglia (DAM) in mice and humans, but  
110 downregulated in astrocyte and oligodendrocyte subpopulations<sup>4,6,18,19</sup>. In microglia and  
111 neurons, *APOE* interacts with LDL receptors to facilitate endocytosis of cholesterol and  
112 phospholipids and modulate lipid homeostasis in the brain<sup>20</sup>. Such studies provide growing  
113 support for cell type-specific functions of *APOE*, however, its effects on microglia remain to  
114 be fully elucidated. Thereby identifying age, sex and *APOE*-associated pathways in  
115 microglia will provide greater insight into the functions of specific microglial subsets in  
116 relation to these risk factors. Inter-individual variability and diversity in functional states  
117 makes targeting specific microglial subsets in disease challenging for modulating these  
118 cells<sup>2</sup>. Identifying the mechanisms regulating microglial homeostasis and activation can allow  
119 us to manipulate these cells for therapeutic purposes.

120 In this study, we leveraged both bulk and single cell approaches to provide a comprehensive  
121 characterization of the adult human microglial transcriptome. We obtained fresh  
122 intraoperative neurosurgical brain tissue and isolated an enriched population of microglial  
123 cells to investigate transcriptional changes associated with age, sex and *APOE*- $\epsilon$ 4 in bulk  
124 microglia and further explored these in single microglial cells. Our findings support age-, sex-  
125 and *APOE*-related microglial transcriptome changes involving lipid and carbohydrate  
126 metabolic pathways and implicate microglial immunometabolism perturbations relevant to  
127 neurodegenerative diseases.

128

129 **Methods**

130 ***Patient Samples***

131 Fresh human brain tissue was obtained from patients undergoing neurosurgical procedures  
132 for epilepsy or tumor resection. Tissues determined to be grossly unaffected by the primary  
133 disease process were utilized for the present study (**Supplementary Figure 1**). Patient  
134 samples were transported from the operating room to the laboratory in 1X DPBS  
135 (Thermofisher; 14287080) for processing within 1-2 hours of resection. Human tissue was  
136 collected with informed consent prior to surgery and all procedures were approved by the  
137 Mayo Clinic Institutional Review Board and are HIPAA compliant.

138 ***Tissue Dissociation***

139 Tissue was dissected to remove necrotic tissue, white matter and excess vascular tissue, to  
140 retain only cortical grey matter. The remaining tissue was cut into sagittal slices and weighed  
141 before being processed using the Adult Brain Dissociation Kit (Miltenyi; 130-107-677) as per  
142 the manufacturer's protocol. Debris removal (Miltenyi; 130-109-398) and red blood cell lysis  
143 (Miltenyi; 130-094-183) were also performed. All procedures were carried out on ice. The  
144 resulting homogenate was filtered through a 70µm filter before proceeding.

145 ***Magnetic-Activated Cell Sorting (MACS)***

146 The cell suspension was incubated with anti-CD11b microbeads (Miltenyi; 130-049-601  
147 clone M1/70) for 15 minutes according to manufacturer's recommendation. This was then  
148 washed with PB buffer (0.5% BSA, 1X PBS Ca<sup>2+</sup>/Mg<sup>2+</sup> free pH 7.4) and filtered through a  
149 70µm cell strainer before being applied to a large separation column (Miltenyi; 130-042-401)  
150 in a QuadroMACS separator magnet (Miltenyi; 130-090-976). The CD11b<sup>+</sup> fraction was  
151 collected and resuspended in sterile filtered FACS staining buffer (1X PBS Ca<sup>2+</sup>/Mg<sup>2+</sup> free,  
152 0.5% BSA, 2% FBS, 3mM EDTA) for antibody staining.

153 ***Fluorescence-Activated Cell Sorting (FACS)***

154 The CD11b<sup>+</sup> fraction was incubated in Human TruStain FcX blocking solution (1:20,  
155 Biolegend; 422302) at room temperature for 10 minutes. Subsequently, cells were stained  
156 with anti-CD11b PE/Cy7 (1:100, Biolegend; 101206, M1/70) and anti-CD45 Alexa Fluor 647  
157 (1:100, Biolegend; 304056, HI30) antibodies for 30 minutes on ice. Following two washes  
158 with FACS staining buffer, SYTOX Green viability dye (1:1000, ThermoFisher; S7020) was  
159 added for an additional 20 minutes. Single cell suspensions were filtered through a 40µm  
160 cell strainer (Falcon; 352235) before sorting on a BD FACS Aria II (BD Biosciences).  
161 CD11b<sup>+</sup>/CD45<sup>intermediate</sup>/SYTOX green<sup>-</sup> cells were sorted directly into FACS staining buffer. An  
162 example of our FACS gating strategy is provided in **Supplementary Figure S2a**.

### 163 ***RNA Isolation and Sequencing***

164 RNA from sorted microglial cells was isolated using the miRNeasy Serum/Plasma Kit  
165 (QIAGEN; 217184) and quantified on the Agilent BioAnalyzer 2100. cDNA libraries were  
166 generated using SMARTSeq2 v4 and Nextera Low Input Library Prep Kit. Samples were  
167 multiplexed and sequenced on the Illumina HiSeq 4000.

168 RNA from frozen bulk tissue was isolated using Trizol and chloroform, followed by DNase  
169 and clean up using the RNeasy Kit (QIAGEN; 74106). Libraries were generated using the  
170 TruSeq Stranded mRNA Library Prep Kit. Samples were multiplexed and sequenced on the  
171 Illumina HiSeq 4000. Base-calling of all sequence data was performed using Illumina's RTA  
172 v2.7.7.

### 173 ***10X Single Cell 3' v3 Library Preparation of Sorted Microglia***

174 Viability of MACS plus FACS sorted cells was assessed by Trypan blue (Gibco; 15250061)  
175 exclusion and cell density was determined using a hemocytometer prior to adjustment to  
176 target 4000-5000 cells. Cells were loaded onto a 10X Chromium chip and run on the  
177 GemCode Single Cell Instrument (10X Genomics) to generate single cell gel beads-in-  
178 emulsion (GEMs). Single cell RNA-seq libraries were prepared using the Chromium Single  
179 Cell 3' Gel Bead and Library Kit v2 and v3 (10X Genomics; 120237) and the Chromium i7



180 Multiplex Kit (10X Genomics; 120262) according to the manufacturer's instructions. Quality  
181 of cDNA libraries was determined using a BioAnalyzer 2100 DNA High Sensitivity assay  
182 (Agilent; 5067-4626) prior to sequencing one per lane on an Illumina HiSeq 4000.

### 183 ***Validation with Quantitative Real-Time PCR***

184 Total RNA was extracted from sorted cells using the miRNeasy Serum/Plasma Kit (QIAGEN;  
185 217184). Concentration and quality were assessed using the Agilent BioAnalyzer RNA 6000  
186 Pico Kit (Agilent; 5067-1514). RNA was normalized to 0.5ng/μl for cDNA synthesis using the  
187 SuperScript IV VILO Master Mix (ThermoFisher; 11756050). TaqMan PreAmp Master Mix  
188 (ThermoFisher; 4391128) was used to pre-amplify the cDNA, followed by TaqMan Universal  
189 PCR Master Mix (ThermoFisher; 4304437) with the following gene expression probes: *MOG*,  
190 *AQP4*, *THY1*, *PTPRC*, *ITGAM*, *P2RY12*, *PECAM1*, *CD34*, *GAPDH* (ThermoFisher;  
191 Hs01555268\_m1, Hs00242342\_m1, Hs00174816\_m1, Hs04189704\_m1, Hs00355885\_m1,  
192 Hs00224470\_m1, Hs01065279\_m1, Hs02576480\_m1, Hs99999905\_m1). RT-qPCR was  
193 performed on a QuantStudio 7 Flex Real-Time PCR System (ThermoFisher) using a relative  
194 standard curve to quantify gene expression.

### 195 ***Validation with Immunocytochemistry***

196 Cultured cells were fixed with 4% paraformaldehyde (PFA) overnight at 4°C and blocked  
197 with blocking solution (10% BSA, 5% normal goat serum and 0.1% Triton-X). Fixed cells  
198 were stained with anti-TMEM119 (1:100, Biolegend; 853302) extracellular primary antibody  
199 with Goat anti-mouse IgG secondary antibody conjugated to Alexa-488 (1:100, Abcam;  
200 ab150113). Nuclei were stained with 1μg/ml DAPI (1:1000, ThermoFisher; 62248) before  
201 mounting with AquaPoly Mount (Poly Sciences, 18606-20). Images were acquired with a  
202 Zeiss LSM880 Confocal microscope using a Plan-Apochromat 20x magnification and 0.8  
203 objective at 1024 by 1024 pixels with a 0.5 microsecond pixel dwell time.

### 204 ***Data Analysis***

### 205 ***Bulk Microglia RNA-seq Processing***

206 The MAPR-Seq pipeline<sup>21</sup> was used to align reads to human reference genome hg38 using  
207 STAR<sup>22</sup> and count reads using featureCounts<sup>23</sup>. FastQC was used for quality control (QC) of  
208 raw sequence reads, and RSeQC was used for QC of mapped reads. Quality measures  
209 were examined including base calling quality, GC content, mapping statistics and sex check  
210 to ensure consistency between the recorded and inferred sex from expression of  
211 chromosome Y genes. Raw read counts were normalized using Conditional Quantile  
212 Normalization (CQN) to generate log<sub>2</sub> scaled expression values via the Bioconductor  
213 package cqn, accounting for sequencing depth, gene length and GC content. Normalized  
214 CQN expression values were assessed using Principal components analysis (PCA) to  
215 identify and remove outliers, defined as greater than 4 standard deviations from the mean of  
216 the first two principal components. In addition, RPKM (reads per kilo bases per million)  
217 values were calculated.

#### 218 ***Identification of a Core Microglial Signature from Bulk Microglia Data***

219 To define a core microglial signature, we compared our bulk microglia data to AMP-AD bulk  
220 tissue transcriptome data from 7 different datasets representing 6 brain regions (Synapse  
221 ID: syn2580853); Mayo Clinic<sup>24</sup> (cerebellum and superior temporal gyrus), Mount Sinai Brain  
222 Bank<sup>25</sup> BM10 (frontal pole), BM22 (superior temporal gyrus), BM36 (parahippocampal  
223 gyrus), BM44 (inferior frontal gyrus) and Rush University Religious Order Study-Memory and  
224 Aging Project (ROS-MAP)<sup>26</sup> (dorsolateral prefrontal cortex). Raw gene counts and metadata  
225 (see Acknowledgements) were obtained from the AMP-AD RNAseq Harmonization study  
226 which had performed alignment and processing of all datasets and brain regions through a  
227 consensus pipeline<sup>27</sup>. Samples were removed that had inconsistent sex between that  
228 indicated in metadata and that inferred from RNAseq expression; a RIN < 5; were identified  
229 as gene expression outliers based on principal component analysis (PCA) (> 4 standard  
230 deviation (SD) from mean PC1 or PC2), or missing metadata. In addition, duplicates (lowest  
231 read count sample removed) and those with rRNA (>5%) were removed from the MSBB  
232 datasets. Furthermore, samples not meeting neuropathological criteria as Alzheimer's

233 disease (AD)<sup>28</sup> or control were excluded. Raw read counts were normalized using  
234 Conditional Quantile Normalization (CQN). Log<sub>2</sub> fold change and q-values between each  
235 bulk tissue brain region and the bulk microglia profiles were calculated for each gene via  
236 linear regression using log<sub>2</sub>(RPKM) without correction for covariates. Genes were filtered  
237 using a cutoff of 4-fold greater expression in bulk microglia compared to each bulk tissue  
238 region and  $q < 0.05$ . Genes that passed these criteria and were significant in comparisons  
239 with all 7 bulk brain datasets determined the microglial signature. These signature genes  
240 were assessed for GO term enrichment with biological pathways using MSigDB. REViGO<sup>29</sup>  
241 tree plots were generated in R using GO terms obtained from MSigDB.

### 242 ***Weighted Gene Co-Expression Network Analysis***

243 The CQN normalized expression values from bulk microglia were input to R WGCNA<sup>30</sup>  
244 package v1.69. This analysis included 14,149 expressed genes, i.e. median(CQN) > 2.  
245 Modules were identified, their eigengenes were calculated and merged if correlation of  
246 eigengenes > 0.7. Genes in the 40 modules identified were tested for GO term enrichment  
247 via WGCNA. Module membership (MM) for each gene was calculated as the correlation  
248 between expression of each gene and its module eigengene. Genes with MM  $\geq 0.7$  are  
249 considered the hub genes for the network. Gene co-expression network plots were  
250 generated in Cytoscape v3.8 (<http://www.cytoscape.org/>). Each module eigengene was  
251 tested for association with age, sex and *APOE* using Pearson correlation. Co-expression  
252 network genes were annotated if they were significantly associated ( $p < 0.05$ ) with the tested  
253 trait.

### 254 ***Over-Representation and Correlation Analyses***

255 Hypergeometric testing was performed in R to determine the enrichment of a select set of  
256 genes in previously reported signatures, bulk tissue expressed genes, WGCNA modules or  
257 10X single cell clusters. Correlation between bulk tissue and bulk microglial normalized CQN  
258 data was calculated using Spearman's rank correlation. Concordant and discordantly  
259 correlated genes were determined using the upper and lower quartiles from each dataset.

## 260 ***Single Cell Data Analysis***

261 For single cell RNA samples, 10X Genomics Cell Ranger Single Cell Software Suite v3.1.0<sup>31</sup>  
262 was used to demultiplex raw base call files generated from the sequencer into FASTQ files.  
263 Raw reads were aligned to human genome build GRCh38. Reads aligned to gene transcript  
264 locus were counted to generate raw UMI counts per gene per barcode for each sample. The  
265 raw UMI matrices were filtered to only keep barcodes with > 500 UMIs and those that were  
266 called a cell by Cell Ranger's cell calling algorithm.

267 Quality control, normalization, clustering and marker gene identification were performed with  
268 Seurat v3<sup>32</sup>, followed by annotation of clusters using established cell type markers. We kept  
269 1) barcodes with > 10% of UMI mapped to mitochondrial genome; 2) barcodes with < 400 or  
270 > 8000 detected genes; 3) barcodes with < 500 or > 46,425 mapped UMIs; 4) genes that are  
271 detected in < 5 cells. These thresholds were determined by UMI or gene distribution to  
272 identify undetectable genes and outlier barcodes that may encode background, damaged or  
273 multiple cells. UMI counts of remaining cells and genes were normalized using  
274 NormalizeData function, which gave natural log transformed expression adjusted for total  
275 UMI counts in each cell. The top 2000 genes whose normalized expression varied the most  
276 across cells were identified through FindVariableFeatures function with default parameters.  
277 Using those genes, cells from 6 samples were integrated using functions  
278 FindIntegrationAnchors and IntegrateData with default parameters. Principal components  
279 (PCs) of the integrated and scaled data were computed; and the first 31 PCs, which  
280 accounted for > 95% variance, were used in clustering cells. Cell clustering was performed  
281 using FindNeighbors and FindClusters with default parameters. Marker genes were  
282 identified in each cluster using FindMarkers in Seurat. Marker genes on one cluster must 1)  
283 be present in > 20% cells in the cluster; 2) the log(fold change) between expression in the  
284 cluster and other clusters must be > 0.25; 3) the rank sum test p-value (Bonferroni-adjusted)  
285 between cells in the cluster and cells in other clusters < 0.05.

286

287 **Results**

288 To uncover microglial transcriptional profiles and their associations with age, sex and *APOE*,  
289 we performed microglial cell-type specific and single cell RNA sequencing (scRNAseq)  
290 studies in fresh human brain tissue. We isolated CD11b<sup>+</sup> microglial cell populations from  
291 neurosurgical tissue unaffected by the primary disease process (**Supplementary Figure S1**)  
292 and obtained from 19 human donors for bulk microglia RNA sequencing (RNAseq) (**Figure**  
293 **1a**). Subsets of these and additional samples also underwent 10x scRNAseq (n=5) and bulk  
294 tissue RNAseq (n=9) (**Supplementary Table S1**). Validation of sorted microglia using qPCR  
295 showed the expected *CD11b<sup>+</sup>/CD45<sup>intermediate</sup>/P2RY12<sup>+</sup>* microglial signature<sup>2</sup> with no  
296 expression of other cell type markers, indicating that we isolated a highly enriched microglial  
297 population (**Supplementary Figure S2**).

298 **Identification of a core human microglial transcriptional signature**

299 To define a core human microglial signature, we calculated log<sub>2</sub> fold change and q-values of  
300 differential expression for each gene between bulk microglia RNAseq data in our study and  
301 bulk brain RNAseq data from 7 AMP-AD datasets provided by Mayo Clinic<sup>24</sup>, Mount Sinai  
302 Brain Bank<sup>25</sup> and Rush University Religious Orders Study and Memory and Aging Project  
303 (ROS-MAP)<sup>26</sup> representing 6 brain regions from 515 human samples. Using a cutoff of 4-fold  
304 greater expression in our bulk microglia and a q-value threshold of 0.05, we identified 1,971  
305 genes (**Supplementary Tables S2-4**). These genes were expressed at significantly greater  
306 levels in our bulk microglial transcriptome data in comparison to each of the bulk brain  
307 transcriptome datasets. Therefore, we considered these 1,971 genes as the core microglial  
308 signature in our dataset. This signature comprises several known marker genes, with 12.7%  
309 of the genes being BRETIGEA<sup>33</sup> microglial genes, suggesting that it also likely harbors novel  
310 microglial markers of interest. GO enrichment using MSigDB showed that this signature was  
311 enriched for genes involved in immune-related and inflammatory response pathways as  
312 would be expected, and leukocyte mediated immunity (**Figure 1b**).

313 To determine the ability of bulk brain tissue data to capture microglial genes, we assessed  
314 the expression levels of our microglial signature genes in each of the 7 AMP-AD bulk brain  
315 RNAseq datasets. Of the 1,971 microglial signature genes in our study, 37-47% were  
316 captured in these bulk brain datasets, with least numbers captured in MSSM superior  
317 temporal gyrus and most numbers in Mayo Clinic cerebellum (**Supplementary Figure S3a-**  
318 **b**). Our microglial signature genes comprised 3.6-4.5% of the expressed bulk brain  
319 transcriptome, consistent with prior estimations<sup>6,34</sup>. We next compared bulk microglia  
320 RNAseq transcript levels to that obtained from bulk tissue RNAseq of neurosurgical fresh  
321 brain tissue samples. Bulk fresh brain tissue does not capture all microglial marker genes,  
322 as demonstrated by the low correlation between bulk tissue and bulk microglia data  
323 (**Supplementary Figure S3c**). This reiterates the need for complementary single cell type  
324 data to deconvolute cell type specific expression. We provide the list of microglial signature  
325 genes that are also expressed at high levels in bulk brain tissue data (**Supplementary**  
326 **Table S5**), which can serve as a validated resource for microglial signature gene markers in  
327 bulk RNAseq datasets.

328 To determine how the microglial signature in this study compared to previously published  
329 signatures, we performed hypergeometric tests of overrepresentation with Galatro, et al.<sup>12</sup>,  
330 Gosselin, et al.<sup>35</sup> and Olah, et al.<sup>13</sup> studies. Significant overlap was observed across all  
331 datasets, with 350 genes common to all datasets (**Figure 1c-d, Supplementary Table S4**).  
332 This comprised several established microglial marker genes, including *P2RY12*, *TMEM119*  
333 and *CX3CR1*. The most significant overlap was shared with Gosselin, et al.<sup>35</sup> signature  
334 [OR=19.6 (17.0-Inf) p=3.8E-261], where 49.7% of their genes were also present in our  
335 signature, and 22% of ours in their signature. Gosselin, et al.<sup>35</sup> samples were also obtained  
336 from neurosurgical tissue resections like our cohort; and are unlike Galatro, et al.<sup>12</sup> and  
337 Olah, et al.<sup>13</sup> samples that were harvested during autopsy. Although there appears to be a  
338 common set of microglial genes consistent across signatures, each also harbors many  
339 unique genes, which could be due to study or individual specific differences.

340 **Transcriptional profiling of microglia discovers co-expression networks and**  
341 **implicates lipid and carbohydrate metabolism pathways associated with age, sex and**  
342 ***APOE***

343 We generated gene co-expression networks using WGCNA<sup>30</sup> to reduce number of tests and  
344 increase power to detect genetic associations with age, sex and *APOE*. We identified 7  
345 modules with significant associations (**Figure 2; Supplementary Figure S4;**  
346 **Supplementary Table S6**). Modules ME14 and ME34 associated with age, however, in  
347 opposite directions. ME14 was enriched for genes involved in the lipid localization pathway  
348 that were upregulated with age ( $R=0.50$ ,  $p=0.03$ ) (**Figure 2a-c**). ME34, enriched for DNA  
349 endoreduplication genes, had negative association with both age ( $R=-0.55$ ,  $p=0.01$ ) and  
350 *APOE-ε4* ( $R=-0.50$ ,  $p=0.03$ ), indicating that microglial transcripts involved in this pathway are  
351 downregulated with aging and in *APOE-ε4* carriers (**Figure 2a**). Several other modules also  
352 associated with *APOE-ε4*, in either direction. The only module associated with sex was  
353 ME26, which was downregulated in females ( $R=-0.54$ ,  $p=0.02$ ), and enriched for genes  
354 involved in cholesterol absorption and lipid digestion. This module also had the most  
355 significant association with *APOE*, in the positive direction with presence of *APOE-ε4*  
356 ( $R=0.66$ ,  $p=0.002$ ) (**Figure 2a,b,e**). Of the *APOE* associated modules, ME23 had the second  
357 most significant association ( $R=-0.61$ ,  $p=0.006$ ) and was enriched for carbohydrate  
358 metabolism genes (**Figure 2a,b,d**). Given recent discoveries in microglial  
359 immunometabolism<sup>36-39</sup>, we focused on ME14, ME23 and ME26 that are enriched for lipid  
360 and carbohydrate metabolism genes.

361 ME14 co-expression network (**Figure 2c**) hub genes *NPC2*, *MSR1* and *PLAU* are also  
362 microglial signature genes in our study and known to be involved in microglial functions<sup>40-</sup>  
363 <sup>44,45</sup>. Several disease-associated microglial (DAM) markers are also present in this network,  
364 including *CD9*, *ARAP2* and *MYO1E*<sup>4,46,47</sup> that are increased with aging, implicating activated  
365 microglial lipid localization pathways in aging (**Figure 2f**). Several genes in this module were  
366 also previously linked to neurodegeneration, including *MYO1E*<sup>48,49</sup>, *CTSL*<sup>50</sup> and *UNC5B*<sup>51,52</sup>.

367 Our microglial signature (**Supplementary Tables S2-S4**) had significant overrepresentation  
368 of the age-associated ME14 genes (**Supplementary Table S6**) (OR=1.55 [95% CI=1.23-  
369 INF], p=0.001), highlighting age-related increases in microglial signature genes. Galatro, et  
370 al.<sup>12</sup> and Olah, et al.<sup>13</sup> also reported age-related microglial signatures. Comparison of ME14  
371 genes revealed significant overlap with Olah, et al.<sup>13</sup> (OR=1.34 [95% CI=1.05-INF] p=0.03),  
372 but not with Galatro, et al.<sup>12</sup> microglial aging signature genes.

373 ME26 cholesterol metabolism pathway genes exhibited reduced expression in males and  
374 were elevated in *APOE-ε4* carriers (**Figure 2a,b**). This module contains known microglial  
375 genes *LDLR*, *CD36* and *CRIP1* (**Figure 2e,f**). Assessment of individual ME26 network  
376 genes revealed *C17orf49*, *RP11-589P10.7* and *MIR497HG* to be the only microglial  
377 signature genes in this network to be associated with both sex and *APOE* (**Figure 2e**). Other  
378 microglial signature genes in ME26 associated with only sex or only *APOE*, suggesting that  
379 these traits may have independent effects on expression of some microglial genes. Several  
380 *APOE*-associated genes in ME26 were previously implicated in AD, including *CASP7*<sup>53,54</sup>  
381 and *LDLR*<sup>55,56</sup> (**Figure 2f**).

382 Carbohydrate metabolism gene enriched module ME23 is downregulated in *APOE-ε4*  
383 carriers (**Figure 2a,b,d**). AD risk genes *BIN1*<sup>57</sup> and *PLCG2*<sup>58</sup> are present in this network,  
384 which have both been implicated in microglial dysfunction in neurodegeneration (**Figure 2d**).

### 385 **Single cell transcriptome reveals specific subtypes of microglia**

386 To uncover distinct microglial subtypes, a subset of sorted microglial samples from  
387 neurosurgical brain tissue underwent single cell expression profiling. We obtained 26,558  
388 cells from 5 unique individuals, including one individual who underwent epilepsy surgery and  
389 had samples from two brain regions (**Supplementary Table S1**). Analysis of the scRNAseq  
390 data from these samples revealed 13 distinct cell clusters which were annotated using  
391 established microglial marker genes from the literature<sup>4,6,9-11,47,59,60</sup> (**Figure 3a**,  
392 **Supplementary Table S7**). Myeloid markers (*AIF1*, *PTPRC*, *C1QA*) were detected in all  
393 clusters except cluster 12 which expressed oligodendrocyte markers (*PLP1*, *MBP*, *MOBP*).



394 Cluster 9 expressed macrophage-specific markers (*VCAN*, *FCN1*, *CRIP1*, *S100A8*). These  
395 two clusters comprised only <3% of all cells, indicating that our sorted samples represent a  
396 very pure microglial population. Each myeloid cluster had cellular contributions from all  
397 samples, albeit with some variability in their proportions, likely due to intrinsic differences  
398 between individuals (**Figure 3b**, **Supplementary Table S8**). Samples from two brain regions  
399 obtained from the same individual undergoing epilepsy surgery revealed similar cellular  
400 contributions in each cluster (**Supplementary Table S8**). For these samples, the most  
401 marked difference was observed for macrophages (cluster 9) and homeostatic microglia  
402 (cluster 2), which had greater contributions from the mesiotemporal and anterior temporal  
403 regions, respectively. This could be due to the proximity of the mesiotemporal sample to the  
404 disease-affected region.

405 We characterized the microglial clusters by their expression of established microglial  
406 subtype markers (**Figure 3c**, **Supplementary Figure S5**) and their most significant marker  
407 genes (**Supplementary Figure S6**). Homeostatic (*TMEM119*, *P2RY12*, *CX3CR1*)<sup>10,11,47,60</sup>,  
408 pro-inflammatory (*CCL2*, *CCL4*, *EGR2*)<sup>10,11</sup> and DAM markers (*APOE*, *C1QA*, *C1QB*)<sup>4,9,11,18</sup>  
409 were observed in clusters 2, 1/6 and 10, respectively. Cluster marker genes are defined as  
410 those expressed in at least 70% of the cells in the cluster with log fold change > 0.6 and q <  
411 0.05 in comparison to all other clusters. Expression levels of the top marker genes per  
412 cluster are shown (**Figure 3c**; **Supplementary Figure S6**; **Supplementary Table S9**). Most  
413 of these markers are distinct to a single cluster, although some clusters appeared to have  
414 similarities in their marker expressions. To define the proximity of their transcriptional  
415 profiles, we performed hierarchical clustering of the microglial clusters (**Figure 3d**). We  
416 determined that the homeostatic microglia cluster 2 was transcriptionally closest to clusters 7  
417 and 11, which may represent subtypes of homeostatic microglia. Clusters 1 and 6 both  
418 expressed chemokines *CCL2* and *CCL4* representative of pro-inflammatory microglia,  
419 however cluster 6 was more closely related to DAM, whereas cluster 1 represented a more  
420 distinct microglial signature. Cluster 6 highly expressed interferon-related marker *IFITM3*

421 and *ISG15*, also observed in a cluster by Olah et al (2020)<sup>9</sup>, which they defined as an  
422 interferon response-enriched subset. These findings highlight different transcriptional profiles  
423 for the two pro-inflammatory microglial clusters that may represent distinct activated  
424 microglia subtypes. Cluster 3 highly expressed heat shock protein *HSPA1A*, an immediate  
425 early gene<sup>61</sup> reportedly involved in antigen processing<sup>62</sup> and exhibiting decreased gene  
426 expression in multiple sclerosis patients<sup>63,64</sup>. These proteins are involved in the stress  
427 response. Several were upregulated in this cluster, suggesting that this cluster may  
428 represent cells that underwent dissociation-induced stress<sup>11</sup>. Six of the clusters could not be  
429 annotated based on existing cell type markers. Clusters 5/8 and 0/4 were transcriptionally  
430 closest to one another (**Figure 3d**). Cluster 5 has distinct expression of immunoreactive  
431 marker *CD163*, which was not observed in other subsets except macrophages. Several *HLA*  
432 genes are also highly expressed in this cluster. Our findings highlight transcriptional profiles  
433 for known microglial clusters, describe the transcriptional proximity of these clusters and  
434 suggest that less well-defined clusters could potentially represent novel or intermediate  
435 transcriptional states of microglia.

436 To determine whether the bulk microglial co-expression networks (**Figure 2a,c-e**,  
437 **Supplementary Figure S4**) were representative of microglial subtypes, we performed  
438 enrichment analyses of the module genes within the myeloid clusters with sufficient cell  
439 numbers (**Figure 3e**). Age-associated co-expression network ME14, implicated in lipid  
440 metabolism, was significantly enriched in pro-inflammatory (cluster 6) and DAM (cluster 10)  
441 clusters. Genes within module 28, which was significantly upregulated with *APOE-ε4*, had  
442 statistically significant enrichment in all clusters except cluster 7. There was no statistically  
443 significant enrichment for any of the other microglial modules that had significant age, sex or  
444 *APOE* associations, suggesting that these factors may have ubiquitous effects on most  
445 microglial subtypes. Some of the remaining microglial co-expression networks had distinct  
446 patterns of cluster enrichment (**Supplementary Figure S7**), suggesting that some but not all  
447 networks could be representative of distinct microglial subtypes.

448

## 449 **Discussion**

450 Given their critical functions in maintaining homeostasis in the central nervous system (CNS)  
451 in health and their multifaceted roles during neurological diseases<sup>2,3</sup>, understanding the  
452 biology of microglia and characterizing microglial subtypes is essential. Large scale studies  
453 in bulk brain tissue<sup>24-26</sup> have been instrumental in establishing transcriptional profiles in  
454 health and neurodegenerative diseases. Although these studies yielded information on brain  
455 expression signatures and uncovered perturbed pathways and molecules implicated in  
456 Alzheimer's disease and other neurological disorders<sup>65-68</sup>, they are limited in their ability to  
457 provide cell-type specific transcriptional outcomes, especially for less abundant CNS cells  
458 such as microglia<sup>34</sup>. Analytic deconvolution approaches began to leverage these bulk tissue  
459 transcriptome datasets to estimate cell-type specific expression profiles<sup>33,34</sup>, but the accuracy  
460 of these methods relies on the availability of high quality single cell-type datasets. Such  
461 microglia-specific transcriptome datasets are gradually emerging<sup>9,12,13,35</sup>, although the  
462 numbers of unique samples assessed remain limited given the arduous nature of collecting  
463 fresh human brain tissue. Additionally, comparative assessment of bulk brain vs. single cell-  
464 type bulk microglia vs. single-cell microglia studies are still rare<sup>9,69,70</sup>. To our knowledge there  
465 are no studies that evaluate human microglial transcriptome using all three approaches, as  
466 in our study. Further, investigations on effects of genetic and other factors on microglial  
467 transcriptional signatures in humans is likewise sparse, with the exception of age-related  
468 effects assessed in a few studies<sup>12,13,35</sup>. Finally, unlike in bulk tissue studies<sup>33,65-68</sup>, microglia-  
469 specific co-expression networks, their molecular signatures and functional implications have  
470 not been evaluated.

471 In this study, we sought to overcome these knowledge gaps by characterizing the  
472 transcriptome of sorted bulk and single-cell microglial populations isolated from fresh human  
473 brain tissue. We identified a robust microglial signature comprising 1,971 genes enriched for  
474 immune-related functions. These signature genes were selected due to their consistently  
475 higher expression levels in our sorted bulk microglial transcriptome in comparison to 7

476 different bulk brain tissue datasets from 6 different regions<sup>24-26</sup>. We also compared sorted  
477 bulk microglia to bulk fresh brain tissue and identified transcripts that are expressed in both.  
478 The microglial signature genes that are also reliably detected in bulk brain tissue represent a  
479 validated list of microglial markers that can be utilized in bulk brain tissue transcriptome  
480 analytic deconvolution studies<sup>33,34</sup>.

481 Our microglial signature significantly overlapped with other signatures from bulk microglia  
482 previously reported by Galatro, et al.<sup>12</sup>, Gosselin, et al.<sup>35</sup> and Olah et al.<sup>13</sup>, implicating a  
483 core set of genes consistently expressed in this cell type. However, there were additional  
484 genes unique to each signature, likely to be driven by factors such as patient demographics  
485 or study differences. Galatro, et al.<sup>12</sup> and Olah et al.<sup>13</sup> both also reported age-related  
486 microglial expression signatures. We found significant overlap of our age-associated  
487 microglial gene expression module ME14 genes with the latter, which was also enriched for  
488 our microglial signature. This indicates that bulk microglial profiles can effectively capture  
489 genes affected by aging in microglia.

490 We leveraged the co-expression network structure of sorted bulk microglia to further explore  
491 whether microglial subsets were associated with age, sex or *APOE-ε4*. To our knowledge  
492 sex-differences in microglial transcriptome were previously studied only in mice<sup>14-16</sup>, however  
493 *APOE* genotype-specific microglial interactions with amyloid plaques have been previously  
494 observed in mice<sup>15,71</sup> and humans<sup>72</sup>. We identified two network modules associated with age,  
495 one with sex and six with *APOE-ε4*. We observed that two modules, ME14 that is positively  
496 associated with increased age; and ME26 that is positively associated with both *APOE-ε4*  
497 and female sex, were both enriched for lipid metabolism biological terms<sup>36-38</sup>. Module ME14  
498 included genes involved in lipid localization and storage pathways (*PLIN2*, *IL6*, *LPL*, *MSR1*,  
499 *ENPP1*, *PPARG*, *PTPN2*, *SOAT1*, *IKBKE*) and ME26 had lipid digestion/cholesterol  
500 transport pathway genes (*CD36*, *LDLR*). Both modules harbored known microglial genes  
501 (*LDLR*, *CD36*, *CRIP1*, *NPC2*, *MSR1*, *PLAU*) and those that are included in our microglial  
502 signature (*PLIN2*, *IL6*, *MSR1*, *SOAT1*, *IKBKE*, *NPC2*, *PLAU*).

503 Comparing the sorted bulk microglial network modules to scRNAseq microglial clusters, we  
504 determined that ME14 genes were significantly over-represented in pro-inflammatory cluster  
505 6 and disease-associated microglia (DAM) cluster 10. In our study, DAM cluster 10 included  
506 *APOE*, *APOC1*, *ASAH1* and *CTSD*. Of these *APOE*<sup>17,37,73</sup>, *APOC1* and *ASAH1*<sup>74</sup> are  
507 involved in lipid metabolism and neurodegenerative diseases. *APOE*<sup>4,5,18</sup>, *APOC1*<sup>18</sup> and  
508 *CTSD*<sup>4</sup> were also signature genes in mouse models of neurodegenerative diseases<sup>4,5</sup> or  
509 aging<sup>18</sup>. Our pro-inflammatory cluster 6 also included genes associated with mice microglial  
510 neurodegenerative (*FTH1*<sup>4</sup>) or aging signatures (*CCL4*<sup>18</sup>), as well as *IFITM3*<sup>38</sup>, *GOLGA4*<sup>38</sup>,  
511 previously shown to be upregulated in aging lipid droplet accumulating microglia<sup>38</sup>. Our  
512 findings that integrate human sorted bulk RNAseq and scRNAseq data, support a model  
513 where aging human microglia transition to a pro-inflammatory and disease-associated  
514 transcriptional profile which is also associated with perturbations in lipid metabolism in these  
515 cells.

516 There is increasing evidence that tightly controlled lipid metabolism is essential to the  
517 functions of microglia during development and homeostatic functions of adulthood and may  
518 be disrupted in aging and disease<sup>36,37</sup>. The complex interactions between microglial lipid  
519 metabolism and its cellular functions rely on lipid sensing by microglial receptors such as  
520 CD36 and TREM2 and uptake of lipids, including LDL and APOE<sup>36,37</sup>. These interactions are  
521 necessary for microglia to become activated and perform functions including phagocytosis of  
522 myelin<sup>75</sup> and misfolded proteins like amyloid  $\beta$ <sup>76</sup>, cytokine release, migration and  
523 proliferation<sup>36,39</sup>. Studies primarily focused on *in vitro* and animal models suggest disruption  
524 of the microglial immunometabolism and assumption of a pro-inflammatory phenotype with  
525 aging<sup>18,38,77,78</sup> and diseases including multiple sclerosis (MS) and Alzheimer's disease<sup>4,5,79</sup>.  
526 Interestingly, microglial lipid droplet accumulation has been demonstrated under all these  
527 conditions<sup>36-38,75</sup> and lipid droplet accumulating microglia in aging mice were shown to have a  
528 unique transcriptional state<sup>38</sup>. Our findings in sorted cells from fresh human brain tissue  
529 provide transcriptional evidence for immunometabolism changes and pro-inflammatory

530 phenotype with microglial aging, thereby contributing essential complementary data from  
531 humans for this cell type.

532 Besides module ME14, we determined that ME26 is also enriched for lipid metabolism  
533 genes. ME26 module expression is higher in both *APOE-ε4* and female sex, however we  
534 note that in our sorted bulk microglia RNAseq samples, there were no male *APOE-ε4*  
535 carriers. Therefore, the distinct influence of sex and *APOE* on the expression of this module  
536 remains to be established. *APOE-ε4*, a major risk factor for Alzheimer's disease, has the  
537 lowest lipid binding efficiency compared with other *APOE* isoforms<sup>36</sup>. Increased cholesterol  
538 accumulation has been reported in both iPSC-driven astrocytes from *APOE-ε4* carriers<sup>80</sup> and  
539 also in *Apoe*-deficient microglia<sup>75</sup>. These findings collectively support a role for *APOE-ε4*  
540 associated microglial transcriptional changes and disrupted cholesterol metabolism. Using  
541 our sorted microglia RNAseq data, we identified five additional modules that associate with  
542 *APOE-ε4*, one in a positive direction (ME28) and four negatively (ME4, ME23, ME34,  
543 ME36). Of these, module ME23 had the second most significant *APOE-ε4* association after  
544 ME26. Interestingly, ME23 was enriched for carbohydrate metabolism biological processes,  
545 which are also tightly regulated in microglia<sup>39</sup>. Module ME23 harbors known AD risk genes  
546 *BIN1* and *PLCG2*, where the latter is a microglial gene that modulates signaling through  
547 *TREM2*<sup>81</sup> and also a hub gene in this module. ME23 genes *BIN1*, *JUN* and *TGFBR2* were  
548 found to be reduced in a mouse microglial neurodegenerative phenotype gene signature<sup>5</sup>.  
549 These findings further demonstrate the consistency of our human microglial data with that  
550 from mouse models and supports perturbed microglial immunometabolism as a potential  
551 pathogenic mechanism in neurodegeneration.

552 In addition to analyzing gene expression modules from sorted bulk microglia, we also  
553 identified microglial clusters from sorted microglial scRNAseq data. To our knowledge, there  
554 are only two prior publications of scRNAseq characterizations on human microglia<sup>9,10</sup>.  
555 Masuda et al.<sup>10</sup> analyzed 1,602 microglia isolated from 5 control and 5 MS patient brains,  
556 compared their findings to those from mice demonstrating clusters that are common and

557 others that are species-specific. Olah et al. assessed 16,242 microglia from 17 individuals  
558 and characterized subclusters of microglia from patients with mild cognitive impairment, AD  
559 and epilepsy<sup>9</sup>. Our scRNAseq dataset is from 5 unique individuals comprising 26,558 cells,  
560 99.98% of which have myeloid markers. We identified microglial clusters that share  
561 characteristics of those previously reported in mice<sup>4</sup> and humans<sup>9,72</sup>, such as DAM. We also  
562 uncovered clusters that could not be readily annotated, including cluster 7, characterized by  
563 high microglial expression of the astrocytic *SLC1A3*. Microglial expression of *SLC1A3* was  
564 previously shown to occur in mice and humans especially in disease states<sup>82-84</sup>. We also  
565 leveraged these scRNAseq data to further characterize the sorted bulk microglial expression  
566 modules. Hence our microglial scRNAseq data contribute further to the emerging single cell  
567 landscape of this cell type.

568 We acknowledge that our study has several limitations, primarily owing to the difficulty in  
569 obtaining high quality neurosurgical brain tissue, which leads to limited sample size and  
570 variability in tissue, diagnoses and patient demographics. Even though we have utilized  
571 control tissue surgically separated from disease tissue, the samples are from epilepsy and  
572 various brain tumor patients representing multiple diagnoses. Although we isolated microglia  
573 using an approach which should minimize activation, we cannot definitively rule out stress-  
574 induced transcriptomic changes during isolation. Despite these caveats, we could identify  
575 microglial co-expression modules and subclusters with multiple features that are consistent  
576 with prior publications from model systems<sup>4,5,18,38</sup>. Our scRNAseq clusters have contributions  
577 from both tumor and epilepsy samples, suggesting that our findings are unlikely to be driven  
578 by any one diagnoses.

579 In summary, our study on sorted bulk microglia RNAseq and scRNAseq from fresh brain  
580 tissue yield several key findings. We identify a microglial gene signature from sorted bulk  
581 microglia, characterize its expression in bulk brain RNAseq across 7 datasets comprising 6  
582 regions, in bulk fresh brain RNAseq and in microglial scRNAseq subtype clusters. This  
583 signature provides a well-characterized resource which can be utilized in analytic

584 deconvolution studies of bulk transcriptome data<sup>33,34</sup>. We uncovered microglial gene  
585 expression modules associated with age, sex and/or *APOE-ε4*. Modules with age and  
586 *APOE-ε4* associated transcriptional changes implicate microglial lipid and carbohydrate  
587 metabolism perturbations and microglial activation. Microglial scRNAseq data highlight the  
588 transcriptional complexity of this cell type, reveal both known and novel cell types and  
589 demonstrate utility of this data in characterizing sorted bulk RNAseq data. These findings  
590 provide support for the emerging microglial immunometabolism<sup>36,39</sup> pathway as a plausible  
591 therapeutic target in aging-related disorders; and provide a well-characterized human  
592 transcriptome resource for the research community on this cell type with central roles in  
593 health and disease<sup>1</sup>.

594



595 **Acknowledgements**

596 The authors thank the patients and their families for their participation, without whom these  
597 studies would not have been possible.

598 This study was supported by NIH funding U01 AG046193, RF1 AG051504, R01 AG051504  
599 to NET.

600 We thank our colleagues in the neurosurgery team Christopher Louie, Karim ReFaey and  
601 Ivan Segura Duran. We thank our colleagues at the Mayo Clinic Genome Analysis Core  
602 (GAC) for their collaboration, particular gratitude to Bruce Eckloff and Julie Lau. We also  
603 acknowledge the AMP-AD RNAseq reprocessing team, in particular Dr. Kirsten Dang, Dr.  
604 Thanneer Perumal and Dr. Ben Logsdon at Sage Bionetworks.

605 **AMP-AD RNASeq datasets:** This study is a cross-consortia project using RNAseq data  
606 generated through grants U01AG046152, U01AG046170, and U01AG046139. **For the**

607 **Mayo RNAseq study:** The results published here are in whole or in part based on data  
608 obtained from the AMP-AD Knowledge Portal (<https://adknowledgeportal.synapse.org/>).

609 Study data were provided by the following sources: The Mayo Clinic Alzheimers Disease  
610 Genetic Studies, led by Dr. Nilüfer Ertekin-Taner and Dr. Steven G. Younkin, Mayo Clinic,  
611 Jacksonville, FL using samples from the Mayo Clinic Study of Aging, the Mayo Clinic  
612 Alzheimers Disease Research Center, and the Mayo Clinic Brain Bank. Data collection was  
613 supported through funding by NIA grants P50 AG016574, R01 AG032990, U01 AG046139,  
614 R01 AG018023, U01 AG006576, U01 AG006786, R01 AG025711, R01 AG017216, R01  
615 AG003949, NINDS grant R01 NS080820, CurePSP Foundation, and support from Mayo  
616 Foundation. Study data includes samples collected through the Sun Health Research  
617 Institute Brain and Body Donation Program of Sun City, Arizona. The Brain and Body  
618 Donation Program is supported by the National Institute of Neurological Disorders and  
619 Stroke (U24 NS072026 National Brain and Tissue Resource for Parkinson's Disease and  
620 Related Disorders), the National Institute on Aging (P30 AG19610 Arizona Alzheimer's

621 Disease Core Center), the Arizona Department of Health Services (contract 211002, Arizona  
622 Alzheimer's Research Center), the Arizona Biomedical Research Commission (contracts  
623 4001, 0011, 05-901 and 1001 to the Arizona Parkinson's Disease Consortium) and the  
624 Michael J. Fox Foundation for Parkinson's Research. **For the ROSMAP study:** The results  
625 published here are in whole or in part based on data obtained from the AMP-AD Knowledge  
626 Portal (<https://adknowledgeportal.synapse.org>). Study data were provided by the Rush  
627 Alzheimer's Disease Center, Rush University Medical Center, Chicago. Data collection was  
628 supported through funding by NIA grants P30AG10161 (ROS), R01AG15819 (ROSMAP;  
629 genomics and RNAseq), R01AG17917 (MAP), R01AG30146, R01AG36042 (5hC  
630 methylation, ATACseq), RC2AG036547 (H3K9Ac), R01AG36836 (RNAseq), R01AG48015  
631 (monocyte RNAseq) RF1AG57473 (single nucleus RNAseq), U01AG32984 (genomic and  
632 whole exome sequencing), U01AG46152 (ROSMAP AMP-AD, targeted proteomics),  
633 U01AG46161(TMT proteomics), U01AG61356 (whole genome sequencing, targeted  
634 proteomics, ROSMAP AMP-AD), the Illinois Department of Public Health (ROSMAP), and  
635 the Translational Genomics Research Institute (genomic). Additional phenotypic data can be  
636 requested at [www.radc.rush.edu](http://www.radc.rush.edu). **For the MSBB study:** The results published here are in  
637 whole or in part based on data obtained from the AMP-AD Knowledge Portal  
638 (<https://adknowledgeportal.synapse.org/>). These data were generated from postmortem  
639 brain tissue collected through the Mount Sinai VA Medical Center Brain Bank and were  
640 provided by Dr. Eric Schadt from Mount Sinai School of Medicine.

#### 641 **Data Sharing Statement**

642 The data in this manuscript are available via the AD Knowledge Portal  
643 (<https://adknowledgeportal.synapse.org>). The AD Knowledge Portal is a platform for  
644 accessing data, analyses and tools generated by the Accelerating Medicines Partnership  
645 (AMP-AD) Target Discovery Program and other National Institute on Aging (NIA)-supported  
646 programs to enable open-science practices and accelerate translational learning. The data,  
647 analyses and tools are shared early in the research cycle without a publication embargo on  
648 secondary use. Data is available for general research use according to the following

649 requirements for data access and data attribution

650 (<https://adknowledgeportal.synapse.org/DataAccess/Instructions>).

| Dataset         | Data Type         | Description                           | SynapseID   | DoD        |
|-----------------|-------------------|---------------------------------------|-------------|------------|
| Mayo RNAseq TCX | Metadata          | Individual human and RNAseq           | syn22228853 | na         |
| Mayo RNAseq CER | Metadata          | Individual human and RNAseq           | syn22228853 | na         |
| Mayo RNAseq TCX | RNASeq Expression | Consensus processed RNASeq raw counts | syn8690799  | 10/2/2019  |
| Mayo RNAseq CER | RNASeq Expression | Consensus processed RNASeq raw counts | syn8690904  | 10/2/2019  |
| ROSMAP          | Metadata          | ID Key                                | syn3382527  | 10/2/2019  |
| ROSMAP          | Metadata          | Individual human                      | syn3191087  | 10/2/2019  |
| ROSMAP          | Metadata          | Assay RNAseq                          | syn21088596 | 1/2/2020   |
| ROSMAP          | RNASeq Expression | Consensus processed RNASeq raw counts | syn8691134  | 10/2/2019  |
| MSBB            | Metadata          | Individual human                      | syn6101474  | 11/22/2019 |
| MSBB            | Metadata          | Assay RNAseq                          | syn6100548  | 10/2/2019  |
| MSBB            | RNASeq Expression | Consensus processed RNASeq raw counts | syn8691099  | 10/2/2019  |

651 **Data from AMP-AD knowledge portal utilized in this study.** DoD = Date of download, “na”  
652 indicates data that was generated by study authors and shared within the AMP-AD knowledge portal.

653

#### 654 **Author Contributions**

655 TP and NET wrote the manuscript; NET and MA designed the study; TP, XW and ZQ  
656 performed data analysis; JC consulted on statistical methods; TP, TPC, XW, YM, RMA  
657 generated tables and figures; EM, CAG, SG, KC, RW, HGC and AQH provided  
658 neurosurgical tissue samples; TP, TPC, LJLT, SJL, SL, FQTN, CCGH, KGM, and TN  
659 performed experimental procedures from blood and tissue samples. All authors read the  
660 manuscript and provided input and consultation. NET oversaw the study and provided  
661 direction, funding and resources.

#### 662 **Competing Financial Interests**

663 None

664

665 **Figures**

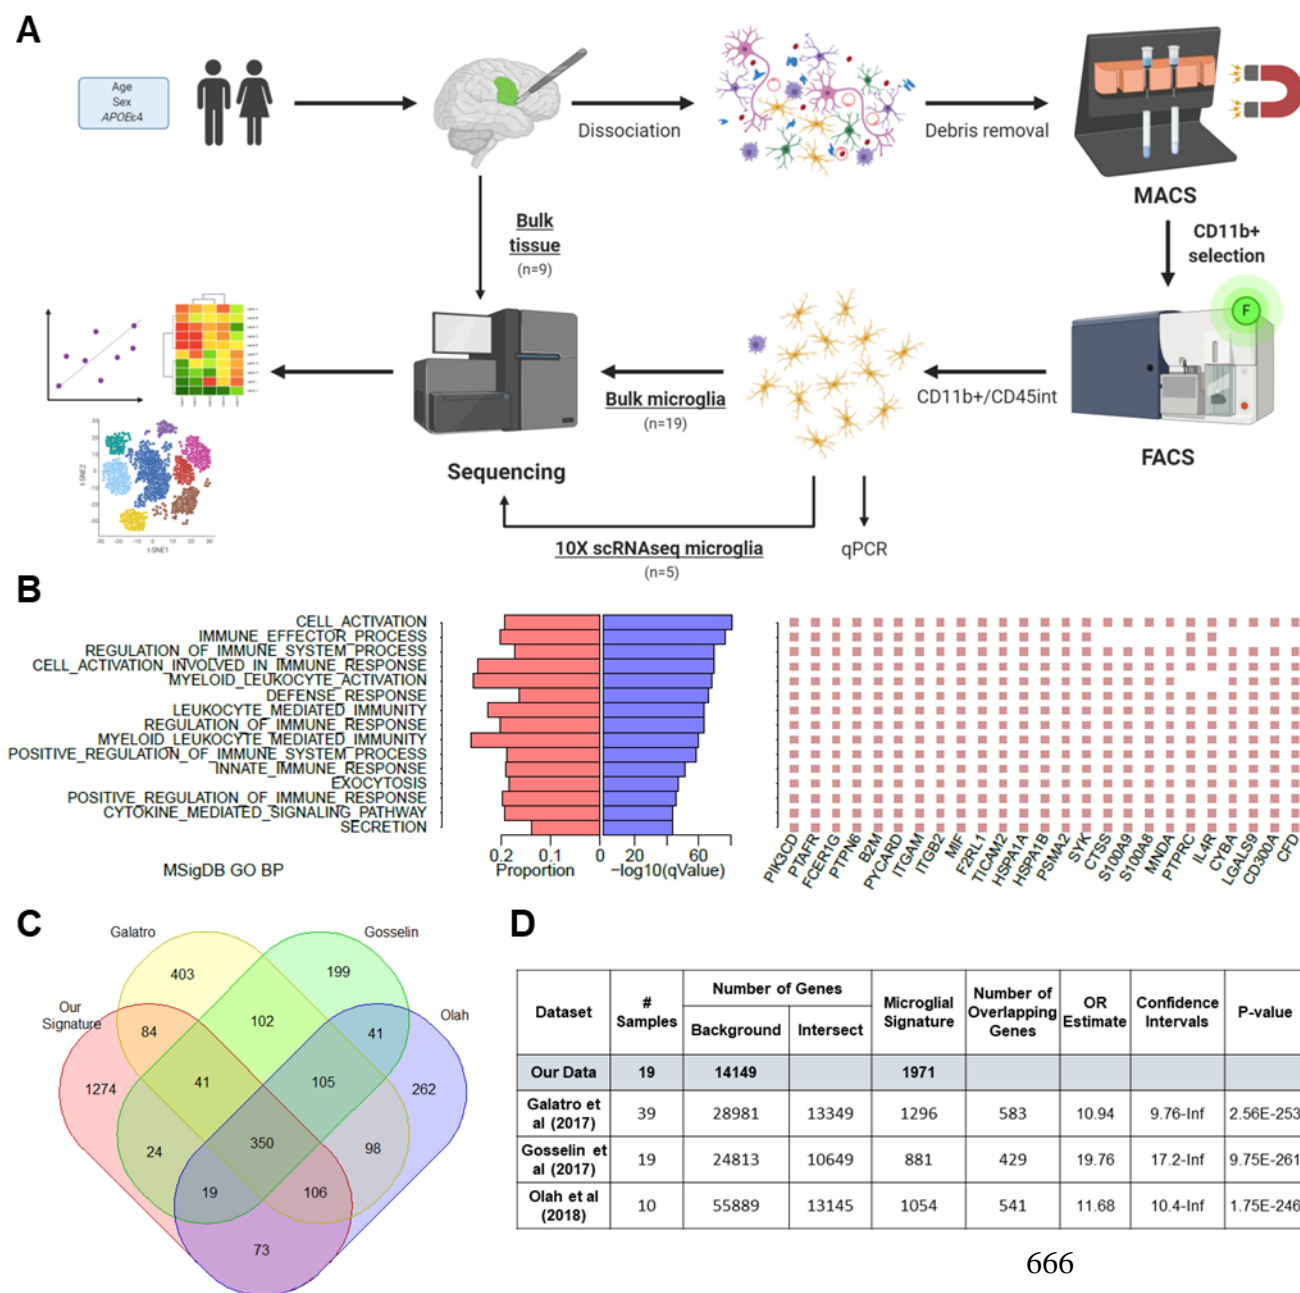

**Figure 1. Characterization of our core human microglial signature.** (A) Schematic illustrating our experimental approach for isolating microglial populations from fresh brain tissue and data analyses. [Created with BioRender.com] (B) MSigDB GO terms enriched in our microglial signature genes and top 25 genes for each. (C) Venn diagram showing number of overlapping genes between our microglial signature and those previously reported from Galatro et al (2017), Gosselin et al (2017) and Olah et al (2018). (D) Hypergeometric tests of overrepresentation showing overlap with the published signatures.

666

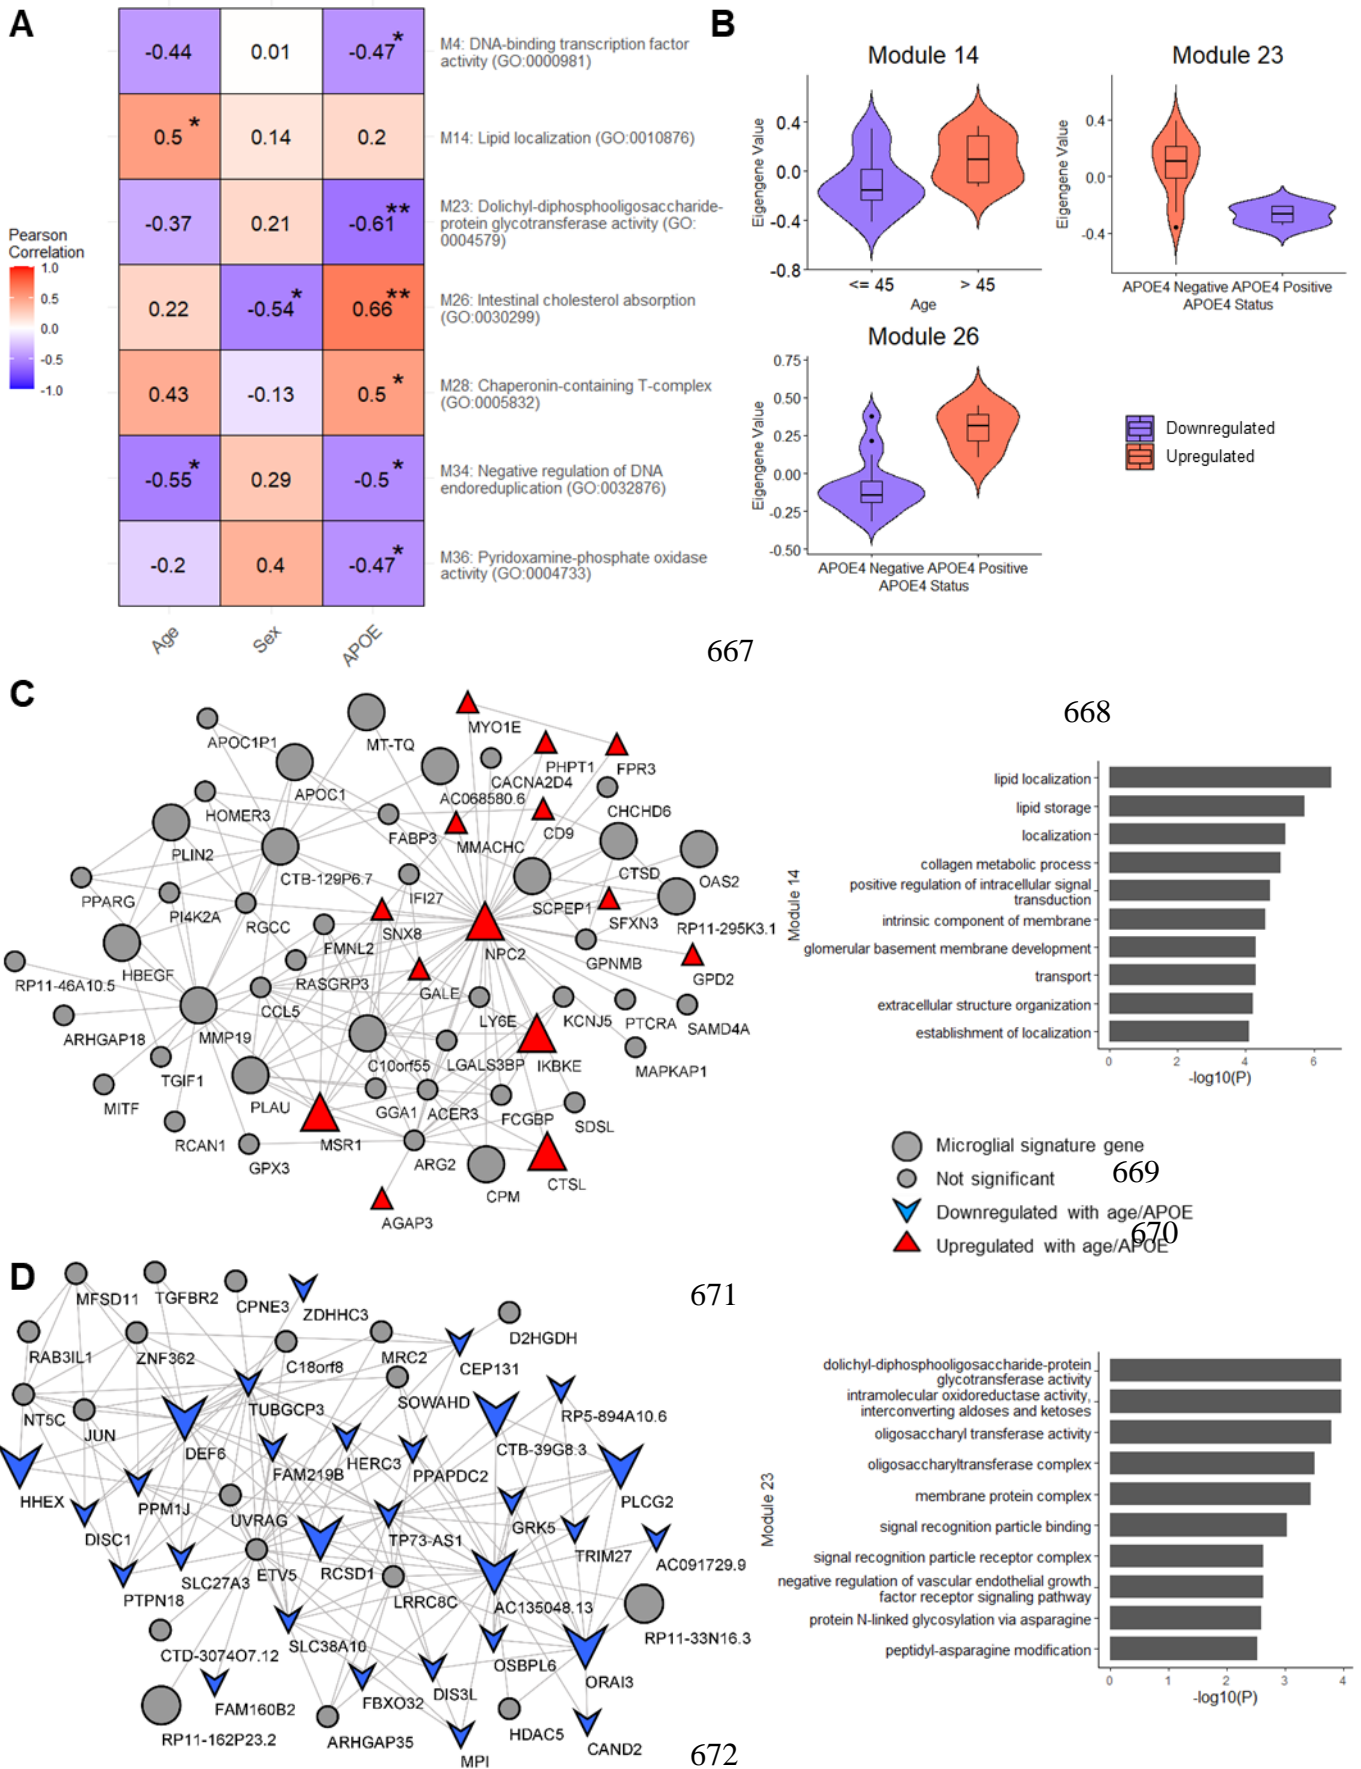

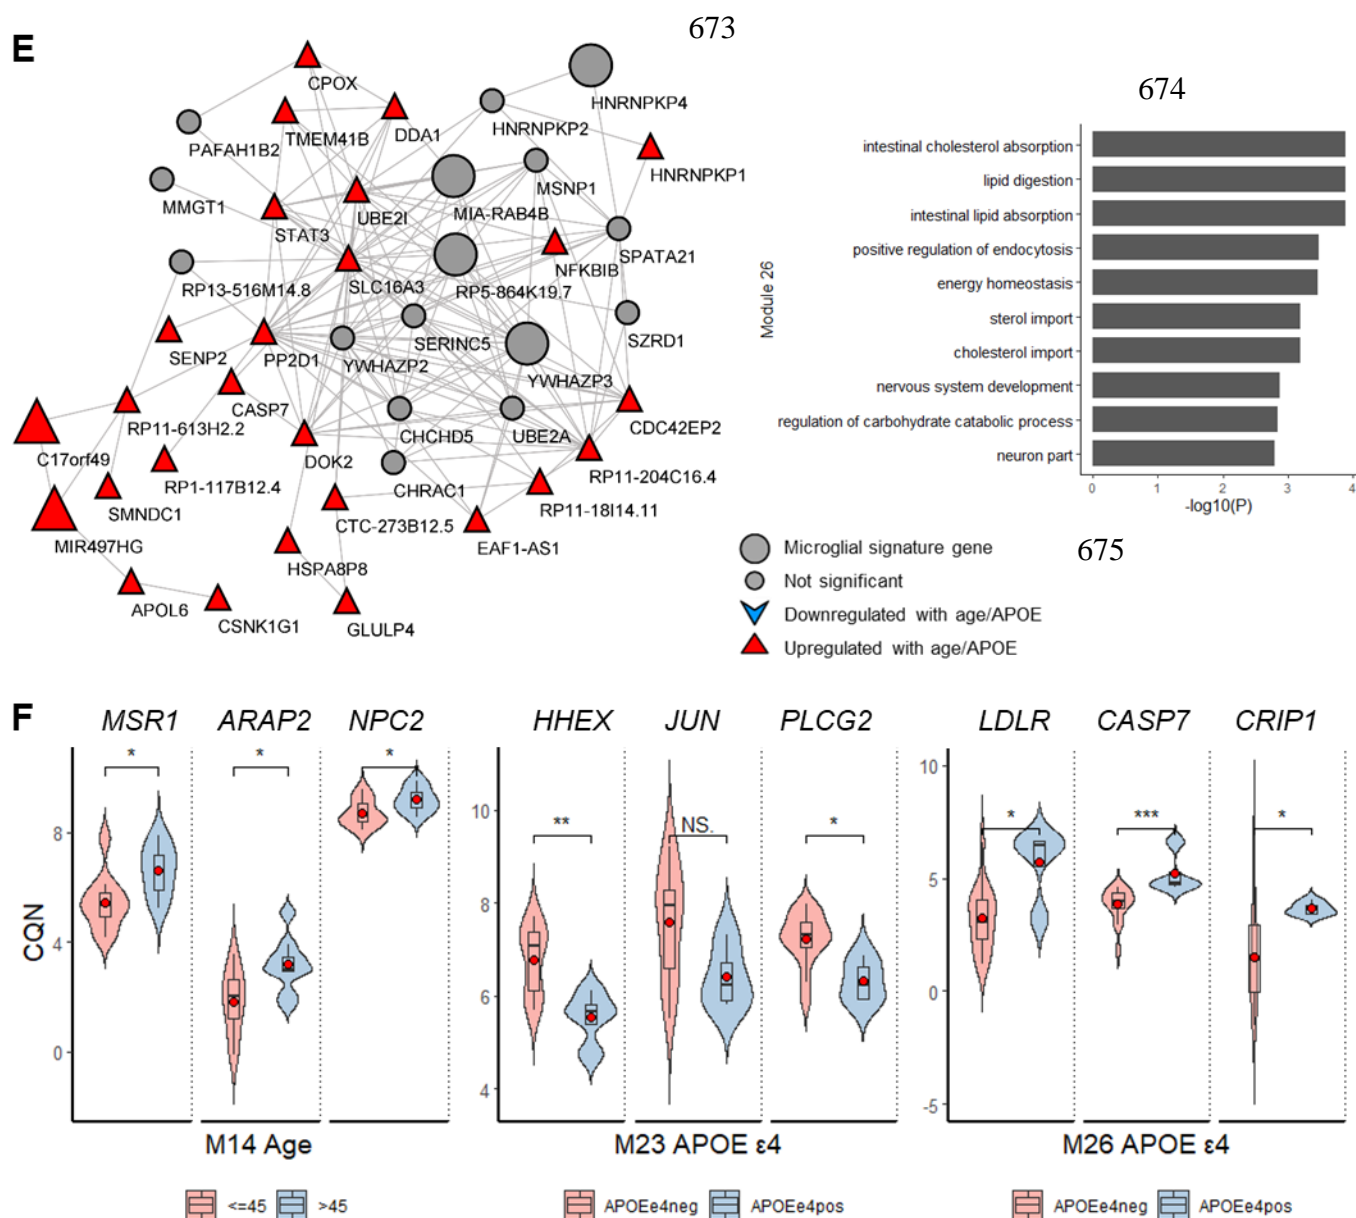

**Figure 2. Age, sex and APOE ε4 pathway correlations in bulk microglia.** (A) Heatmap showing correlation of age, sex and APOE ε4 status with WGCNA module eigengenes (MEs) significantly associated (\*  $p < 0.05$ ; \*\*  $p < 0.01$  \*\*\*  $p < 0.001$ ) with traits, with top GO terms listed for each module. (B) MEs stratified by age or APOE ε4. (c-e) Gene co-expression networks for modules of interest. Genes were tested for association with age, sex or APOE ε4 status using Pearson correlation. (C) Module 14 gene co-expression network, with genes of interest highlighted according to the key. Genes upregulated with age ( $p < 0.05$ ) shown in red triangle (▲). Bar plot of top 10 significant GO terms ( $p < 0.05$ ) for this module. (D) Module 23 gene co-expression network, with genes downregulated in APOE ε4 carriers ( $p < 0.05$ ) shown in blue arrow (▼). Bar plot of top 10 significant GO terms ( $p < 0.05$ ) for this module. (E) Module 26 gene co-expression network, with genes upregulated in APOE ε4 carriers ( $p < 0.05$ ) shown in red triangle (▲). Bar plot of top 10 significant GO terms ( $p < 0.05$ ) for this module. (F) Violin plots showing expression of key genes in modules, stratified by age or APOE. \*  $p < 0.05$ ; \*\*  $p < 0.01$ ; \*\*\*  $p < 0.001$ .

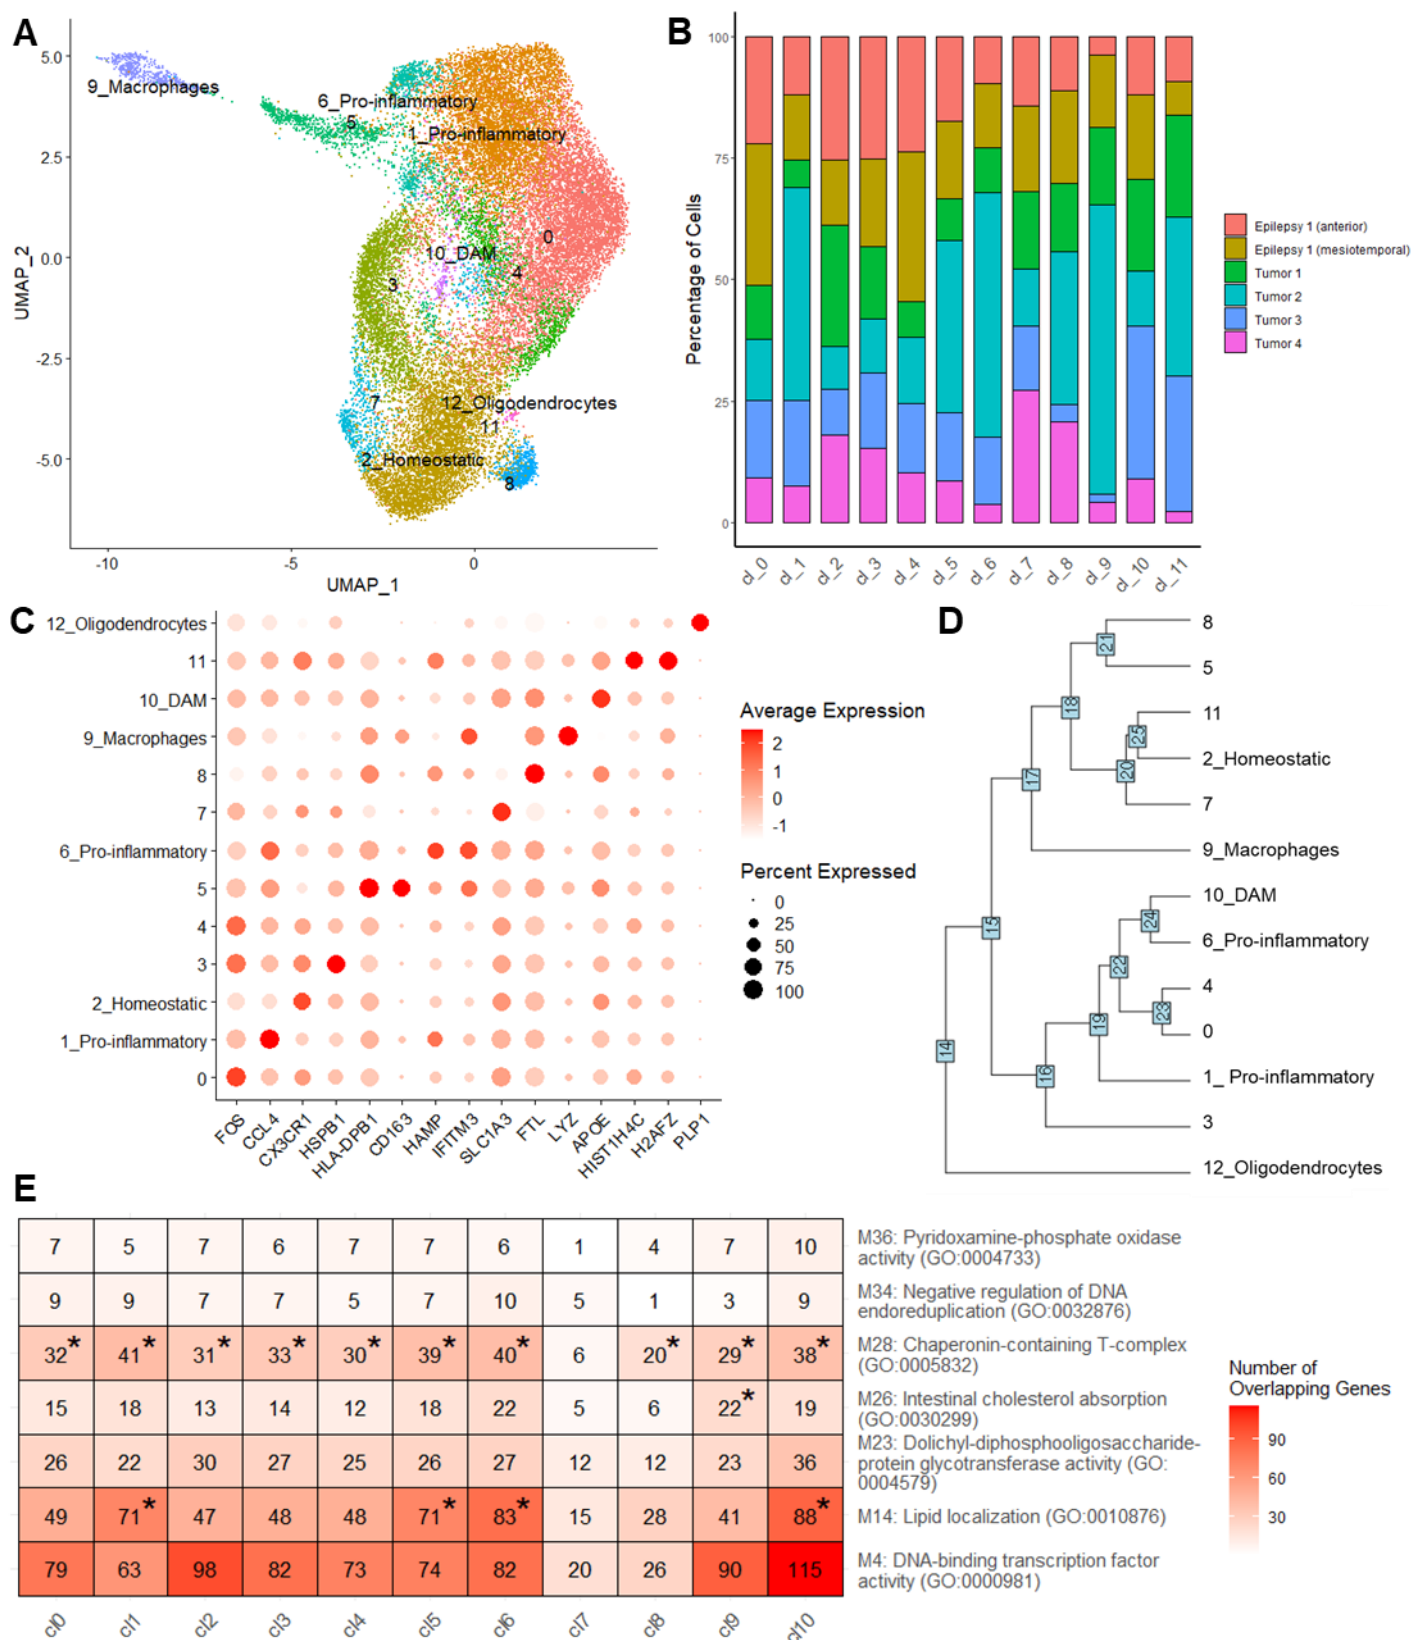

**Figure 3. Single cell characterization of microglia.** (A) UMAP of clustered cells annotated with putative subtypes using cell type markers from the literature. (B) Stacked bar plot showing the distribution of cells across the clusters. (C) Dot plot showing the expression of top cluster marker genes across clusters. (D) Hierarchical clustering to highlight relationships between clusters. (E) Hypergeometric distribution of enrichment between module genes and clusters, showing number of overlapping genes. \* represents module genes that were significantly enriched in the cluster ( $p < 0.05$ ).

677 **References**

- 678 1. Masuda, T., Sankowski, R., Staszewski, O. & Prinz, M. Microglia heterogeneity in the  
679 single-cell era. *Cell Reports* **30**, 1271-1281 (2020).
- 680 2. Li, Q. & Barres, B.A. Microglia and macrophages in brain homeostasis and disease.  
681 *Nat Rev Immunol* **18**, 225-242 (2018).
- 682 3. Hickman, S., Izzy, S., Sen, P., Morsett, L. & El Khoury, J. Microglia in  
683 neurodegeneration. *Nat Neurosci* **21**, 1359-1369 (2018).
- 684 4. Keren-Shaul, H., *et al.* A unique microglia type associated with restricting  
685 development of Alzheimer's disease. *Cell* **169**, 1276-1290 e1217 (2017).
- 686 5. Krasemann, S., *et al.* The TREM2-APOE Pathway Drives the Transcriptional  
687 Phenotype of Dysfunctional Microglia in Neurodegenerative Diseases. *Immunity* **47**,  
688 566-581 e569 (2017).
- 689 6. Mathys, H., *et al.* Single-cell transcriptomic analysis of Alzheimer's disease. *Nature*  
690 **570**, 332-337 (2019).
- 691 7. Del-Aguila, J.L., *et al.* A single-nuclei RNA sequencing study of Mendelian and  
692 sporadic AD in the human brain. *Alzheimer's Research & Therapy* **11**, 71 (2019).
- 693 8. Thrupp, N., *et al.* Single-nucleus RNA-seq is not suitable for detection of microglial  
694 activation genes in humans. *Cell Reports* **32**, 108189 (2020).
- 695 9. Olah, M., *et al.* Single cell RNA sequencing of human microglia uncovers a subset  
696 associated with Alzheimer's disease. *Nat Commun* **11**, 6129 (2020).
- 697 10. Masuda, T., *et al.* Spatial and temporal heterogeneity of mouse and human microglia  
698 at single-cell resolution. *Nature* **566**, 388-392 (2019).
- 699 11. Sankowski, R., *et al.* Mapping microglia states in the human brain through the  
700 integration of high-dimensional techniques. *Nat Neurosci* **22**, 2098-2110 (2019).
- 701 12. Galatro, T.F., *et al.* Transcriptomic analysis of purified human cortical microglia  
702 reveals age-associated changes. *Nat Neurosci* **20**, 1162-1171 (2017).
- 703 13. Olah, M., *et al.* A transcriptomic atlas of aged human microglia. *Nature*  
704 *Communications* **9**, 539 (2018).
- 705 14. Frigerio, C., *et al.* The major risk factors for Alzheimer's Disease: Age, sex, and genes  
706 modulate the microglia response to amyloid-beta plaques. *Cell Reports* **27**, 1293-  
707 1306 e1296 (2019).
- 708 15. Stephen, T.L., *et al.* APOE genotype and sex affect microglial interactions with  
709 plaques in Alzheimer's disease mice. *Acta Neuropathol Commun* **7**, 82 (2019).
- 710 16. Nelson, L.H., Warden, S. & Lenz, K.M. Sex differences in microglial phagocytosis in  
711 the neonatal hippocampus. *Brain, Behavior, and Immunity* **64**, 11-22 (2017).
- 712 17. Yamazaki, Y., Zhao, N., Caulfield, T.R., Liu, C.C. & Bu, G. Apolipoprotein E and  
713 Alzheimer disease: pathobiology and targeting strategies. *Nat Rev Neurol* **15**, 501-  
714 518 (2019).
- 715 18. Hammond, T.R., *et al.* Single-cell RNA sequencing of microglia throughout the mouse  
716 lifespan and in the injured brain reveals complex cell-state changes. *Immunity* **50**,  
717 253-271 e256 (2019).
- 718 19. Grubman, A., *et al.* A single-cell atlas of entorhinal cortex from individuals with  
719 Alzheimer's disease reveals cell-type-specific gene expression regulation. *Nat*  
720 *Neurosci* **22**, 2087-2097 (2019).



- 721 20. Gamache, J., Yun, Y. & Chiba-Falek, O. Sex-dependent effect of APOE on Alzheimer's  
722 disease and other age-related neurodegenerative disorders. *Disease Models &*  
723 *Mechanisms* **13**, dmm045211 (2020).
- 724 21. Kalari, K.R., *et al.* MAP-RSeq: Mayo Analysis Pipeline for RNA sequencing. *BMC*  
725 *Bioinformatics* **15**, 224 (2014).
- 726 22. Dobin, A., *et al.* STAR: ultrafast universal RNA-seq aligner. *Bioinformatics* **29**, 15-21  
727 (2013).
- 728 23. Liao, Y., Smyth, G.K. & Shi, W. featureCounts: an efficient general purpose program  
729 for assigning sequence reads to genomic features. *Bioinformatics* **30**, 923-930  
730 (2014).
- 731 24. Allen, M., *et al.* Human whole genome genotype and transcriptome data for  
732 Alzheimer's and other neurodegenerative diseases. *Sci Data* **3**, 160089 (2016).
- 733 25. Wang, M., *et al.* The Mount Sinai cohort of large-scale genomic, transcriptomic and  
734 proteomic data in Alzheimer's disease. *Sci Data* **5**, 180185 (2018).
- 735 26. De Jager, P.L., *et al.* A multi-omic atlas of the human frontal cortex for aging and  
736 Alzheimer's disease research. *Sci Data* **5**, 180142 (2018).
- 737 27. Wan, Y.W., *et al.* Meta-Analysis of the Alzheimer's Disease Human Brain  
738 Transcriptome and Functional Dissection in Mouse Models. *Cell Rep* **32**, 107908  
739 (2020).
- 740 28. McKhann, G., *et al.* Clinical diagnosis of Alzheimer's disease: report of the NINCDS-  
741 AD/DA Work Group under the auspices of Department of Health and Human  
742 Services Task Force on Alzheimer's Disease. *Neurology* **34**, 939-944 (1984).
- 743 29. Supek, F., Bosnjak, M., Skunca, N. & Smuc, T. REVIGO summarizes and visualizes long  
744 lists of gene ontology terms. *PLoS One* **6**, e21800 (2011).
- 745 30. Langfelder, P. & Horvath, S. WGCNA: an R package for weighted correlation network  
746 analysis. *BMC Bioinformatics* **9**, 559 (2008).
- 747 31. Zheng, G.X.Y., *et al.* Massively parallel digital transcriptional profiling of single cells.  
748 *Nature Communications* **8**, 14049 (2017).
- 749 32. Stuart, T., *et al.* Comprehensive Integration of Single-Cell Data. *Cell* **177**, 1888-  
750 1902.e1821 (2019).
- 751 33. McKenzie, A.T., *et al.* Brain Cell Type Specific Gene Expression and Co-expression  
752 Network Architectures. *Sci Rep* **8**, 8868 (2018).
- 753 34. Wang, X., *et al.* Deciphering cellular transcriptional alterations in Alzheimer's disease  
754 brains. *Mol Neurodegener* **15**, 38 (2020).
- 755 35. Gosselin, D., *et al.* An environment-dependent transcriptional network specifies  
756 human microglia identity. *Science* **356**(2017).
- 757 36. Chausse, B., Kakimoto, P.A. & Kann, O. Microglia and lipids: how metabolism controls  
758 brain innate immunity. *Semin Cell Dev Biol* (2020).
- 759 37. Loving, B.A. & Bruce, K.D. Lipid and Lipoprotein Metabolism in Microglia. *Front*  
760 *Physiol* **11**, 393 (2020).
- 761 38. Marschallinger, J., *et al.* Lipid-droplet-accumulating microglia represent a  
762 dysfunctional and proinflammatory state in the aging brain. *Nat Neurosci* (2020).
- 763 39. Bernier, L.P., York, E.M. & MacVicar, B.A. Immunometabolism in the Brain: How  
764 Metabolism Shapes Microglial Function. *Trends Neurosci* **43**, 854-869 (2020).
- 765 40. El Khoury, J., Hickman, S.E., Thomas, C.A., Loike, J.D. & Silverstein, S.C. Microglia,  
766 scavenger receptors, and the pathogenesis of Alzheimer's disease. *Neurobiol Aging*  
767 **19**, S81-84 (1998).

- 768 41. DePaula-Silva, A.B., *et al.* Differential transcriptional profiles identify microglial- and  
769 macrophage-specific gene markers expressed during virus-induced  
770 neuroinflammation. *J Neuroinflammation* **16**, 152-152 (2019).
- 771 42. Butovsky, O. & Weiner, H.L. Microglial signatures and their role in health and  
772 disease. *Nature Reviews Neuroscience* **19**, 622-635 (2018).
- 773 43. Colombo, A., *et al.* Loss of NPC1 enhances phagocytic uptake and impairs lipid  
774 trafficking in microglia. *Nature Communications* **12**, 1158 (2021).
- 775 44. Mehra, A., Ali, C., Parcq, J., Vivien, D. & Docagne, F. The plasminogen activation  
776 system in neuroinflammation. *Biochimica et Biophysica Acta (BBA) - Molecular Basis*  
777 *of Disease* **1862**, 395-402 (2016).
- 778 45. Cunningham, O., *et al.* Microglia and the urokinase plasminogen activator  
779 receptor/uPA system in innate brain inflammation. *Glia* **57**, 1802-1814 (2009).
- 780 46. Sobue, A., *et al.* Microglial gene signature reveals loss of homeostatic microglia  
781 associated with neurodegeneration of Alzheimer's disease. *Acta Neuropathologica*  
782 *Communications* **9**, 1 (2021).
- 783 47. Rangaraju, S., *et al.* Identification and therapeutic modulation of a pro-inflammatory  
784 subset of disease-associated-microglia in Alzheimer's disease. *Mol Neurodegener* **13**,  
785 24 (2018).
- 786 48. Rangaraju, S., *et al.* Quantitative proteomics of acutely-isolated mouse microglia  
787 identifies novel immune Alzheimer's disease-related proteins. *Mol Neurodegener* **13**,  
788 34 (2018).
- 789 49. Gerrits, E., *et al.* Distinct amyloid- $\beta$  and tau-associated microglia profiles in  
790 Alzheimer's disease. *Acta Neuropathologica* **141**, 681-696 (2021).
- 791 50. Cermak, S., *et al.* Loss of Cathepsin B and L Leads to Lysosomal Dysfunction, NPC-Like  
792 Cholesterol Sequestration and Accumulation of the Key Alzheimer's Proteins. *PLOS*  
793 *ONE* **11**, e0167428 (2016).
- 794 51. Xu, H., Han, Y., Liu, B. & Li, R. Unc-5 homolog B (UNC5B) is one of the key  
795 downstream targets of N- $\alpha$ -Acetyltransferase 10 (Naa10). *Scientific Reports* **6**, 38508  
796 (2016).
- 797 52. Ahn, E.H., Kang, S.S., Qi, Q., Liu, X. & Ye, K. Netrin1 deficiency activates MST1 via  
798 UNC5B receptor, promoting dopaminergic apoptosis in Parkinson's disease.  
799 *Proceedings of the National Academy of Sciences* **117**, 24503-24513 (2020).
- 800 53. Zhang, X., *et al.* A rare missense variant of CASP7 is associated with familial late-  
801 onset Alzheimer's disease. *Alzheimers Dement* **15**, 441-452 (2019).
- 802 54. Ayers, K.L., *et al.* A loss of function variant in CASP7 protects against Alzheimer's  
803 disease in homozygous APOE  $\epsilon$ 4 allele carriers. *BMC Genomics* **17 Suppl 2**, 445  
804 (2016).
- 805 55. Katsouri, L. & Georgopoulos, S. Lack of LDL receptor enhances amyloid deposition  
806 and decreases glial response in an Alzheimer's disease mouse model. *PLoS One* **6**,  
807 e21880 (2011).
- 808 56. Lämsä, R., *et al.* Genetic study evaluating LDLR polymorphisms and Alzheimer's  
809 disease. *Neurobiol Aging* **29**, 848-855 (2008).
- 810 57. Crotti, A., *et al.* BIN1 favors the spreading of Tau via extracellular vesicles. *Scientific*  
811 *Reports* **9**, 9477 (2019).
- 812 58. Sims, R., *et al.* Rare coding variants in PLCG2, ABI3, and TREM2 implicate microglial-  
813 mediated innate immunity in Alzheimer's disease. *Nature Genetics* **49**, 1373-1384  
814 (2017).

- 815 59. Darmanis, S., *et al.* A survey of human brain transcriptome diversity at the single cell  
816 level. *Proceedings of the National Academy of Sciences* **112**, 7285 (2015).
- 817 60. Zhou, Y., *et al.* Human and mouse single-nucleus transcriptomics reveal TREM2-  
818 dependent and TREM2-independent cellular responses in Alzheimer's disease. *Nat*  
819 *Med* **26**, 131-142 (2020).
- 820 61. Schmunk, G., *et al.* Human microglia upregulate cytokine signatures and accelerate  
821 maturation of neural networks. *bioRxiv*, 2020.2003.2024.006874 (2020).
- 822 62. Aung, L.L., *et al.* Multiple sclerosis-linked and interferon-beta-regulated gene  
823 expression in plasmacytoid dendritic cells. *J Neuroimmunol* **250**, 99-105 (2012).
- 824 63. Satoh, J., *et al.* Microarray analysis identifies an aberrant expression of apoptosis and  
825 DNA damage-regulatory genes in multiple sclerosis. *Neurobiol Dis* **18**, 537-550  
826 (2005).
- 827 64. Gandhi, K.S., *et al.* The multiple sclerosis whole blood mRNA transcriptome and  
828 genetic associations indicate dysregulation of specific T cell pathways in  
829 pathogenesis. *Hum Mol Genet* **19**, 2134-2143 (2010).
- 830 65. Allen, M., *et al.* Divergent brain gene expression patterns associate with distinct cell-  
831 specific tau neuropathology traits in progressive supranuclear palsy. *Acta*  
832 *Neuropathol* **136**, 709-727 (2018).
- 833 66. Allen, M., *et al.* Conserved brain myelination networks are altered in Alzheimer's and  
834 other neurodegenerative diseases. *Alzheimers Dement* **14**, 352-366 (2018).
- 835 67. Mostafavi, S., *et al.* A molecular network of the aging human brain provides insights  
836 into the pathology and cognitive decline of Alzheimer's disease. *Nat Neurosci* **21**,  
837 811-819 (2018).
- 838 68. Neff, R.A., *et al.* Molecular subtyping of Alzheimer's disease using RNA sequencing  
839 data reveals novel mechanisms and targets. *Sci Adv* **7**(2021).
- 840 69. Alsema, A.M., *et al.* Profiling Microglia From Alzheimer's Disease Donors and Non-  
841 demented Elderly in Acute Human Postmortem Cortical Tissue. *Frontiers in*  
842 *Molecular Neuroscience* **13**(2020).
- 843 70. Srinivasan, K., *et al.* Alzheimer's Patient Microglia Exhibit Enhanced Aging and  
844 Unique Transcriptional Activation. *Cell Rep* **31**, 107843 (2020).
- 845 71. Shi, Y., *et al.* Microglia drive APOE-dependent neurodegeneration in a tauopathy  
846 mouse model. *Journal of Experimental Medicine* **216**, 2546-2561 (2019).
- 847 72. Nguyen, A.T., *et al.* APOE and TREM2 regulate amyloid-responsive microglia in  
848 Alzheimer's disease. *Acta Neuropathologica* **140**, 477-493 (2020).
- 849 73. Leduc, V., Jasmin-Belanger, S. & Poirier, J. APOE and cholesterol homeostasis in  
850 Alzheimer's disease. *Trends Mol Med* **16**, 469-477 (2010).
- 851 74. Paciotti, S., Albi, E., Parnetti, L. & Beccari, T. Lysosomal Ceramide Metabolism  
852 Disorders: Implications in Parkinson's Disease. *J Clin Med* **9**(2020).
- 853 75. Nugent, A.A., *et al.* TREM2 Regulates Microglial Cholesterol Metabolism upon  
854 Chronic Phagocytic Challenge. *Neuron* **105**, 837-854 e839 (2020).
- 855 76. Yeh, F.L., Wang, Y., Tom, I., Gonzalez, L.C. & Sheng, M. TREM2 Binds to  
856 Apolipoproteins, Including APOE and CLU/APOJ, and Thereby Facilitates Uptake of  
857 Amyloid-Beta by Microglia. *Neuron* **91**, 328-340 (2016).
- 858 77. Norden, D.M. & Godbout, J.P. Review: microglia of the aged brain: primed to be  
859 activated and resistant to regulation. *Neuropathol Appl Neurobiol* **39**, 19-34 (2013).
- 860 78. Koellhoffer, E.C., McCullough, L.D. & Ritzel, R.M. Old maids: Aging and its impact on  
861 microglia function. *Int J Mol Sci* **18**(2017).

- 862 79. Ulland, T.K., *et al.* TREM2 Maintains Microglial Metabolic Fitness in Alzheimer's  
863 Disease. *Cell* **170**, 649-663 e613 (2017).
- 864 80. Lin, Y.T., *et al.* APOE4 Causes Widespread Molecular and Cellular Alterations  
865 Associated with Alzheimer's Disease Phenotypes in Human iPSC-Derived Brain Cell  
866 Types. *Neuron* **98**, 1141-1154 e1147 (2018).
- 867 81. Andreone, B.J., *et al.* Alzheimer's-associated PLCgamma2 is a signaling node required  
868 for both TREM2 function and the inflammatory response in human microglia. *Nat*  
869 *Neurosci* **23**, 927-938 (2020).
- 870 82. Grassivaro, F., *et al.* Convergence between Microglia and Peripheral Macrophages  
871 Phenotype during Development and Neuroinflammation. *The Journal of*  
872 *Neuroscience* **40**, 784-795 (2020).
- 873 83. Chrétien, F., *et al.* Expression of Excitatory Amino Acid Transporter-1 (EAAT-1) in  
874 Brain Macrophages and Microglia of Patients with Prion Diseases. *Journal of*  
875 *Neuropathology & Experimental Neurology* **63**, 1058-1071 (2004).
- 876 84. Wilhelmsson, U., *et al.* Injury Leads to the Appearance of Cells with Characteristics of  
877 Both Microglia and Astrocytes in Mouse and Human Brain. *Cerebral Cortex* **27**, 3360-  
878 3377 (2017).  
879  
880
